# Supplementary material for: CoFe layered double hydroxides with adjustable composition and structure for enhanced oxygen evolution reaction
Source: Royal Society of Chemistry journal article supplement (doi:10.1039/d3nj01275a), 2023-01-01
Supplement: d3nj01275a1.pdf [file d3nj01275a1.pdf]

## Supporting Information

### ***CoFe layered double hydroxides with adjustable composition and structure for enhanced oxygen evolution reaction***

Wan Rong,<sup>ab</sup> Rui Dang,<sup>b</sup> Yunfei Chen,<sup>b</sup> Kang Huang,<sup>a</sup> Jiuyang Xia,<sup>a</sup> Bowei Zhang,<sup>\*a</sup> Jianfei Liu,<sup>b</sup> Meixin Li,<sup>c</sup> Qigao Cao <sup>\*b</sup> and Junsheng Wu <sup>\*a</sup>

<sup>1</sup>Institute of Advanced Materials and Technology, University of Science and Technology Beijing, Beijing 100083, P.R. China.

<sup>2</sup>Northwest Institute For Nonferrous Metal Research, 96 Weiyang Road, Xi'an, Weiyang district, 710016, P.R. China.

<sup>3</sup>The Faculty of Printing, Packaging Engineering and Digital Media Technology, Xi'an University of Technology, Xi'an 710054, P.R. China.

## Corresponding Author

<sup>1</sup>Institute of Advanced Materials and Technology, University of Science and Technology Beijing, Beijing 100083, P.R.China.

\*Email: bwzhang@ustb.edu.cn (Bowe Zhang)

\*Email: wujs76@163.com (Junsheng Wu)

<sup>2</sup>Northwest Institute For Nonferrous Metal Research, 96 Weiyang Road, Weiyang district, 710016, P.R. China.

\*Email: caoqigao@c-nin.com (Qigao Cao)

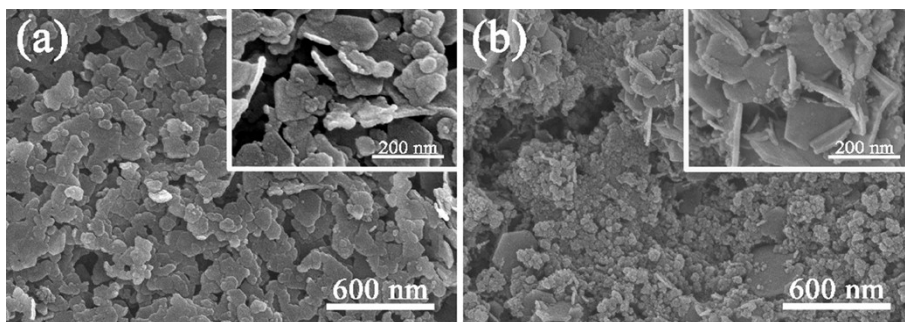

**Fig. S1** SEM images of different samples: (a)  $\text{Co}_2\text{Fe}_1$  LDH and (b)  $\text{Co}_1\text{Fe}_2$  LDH

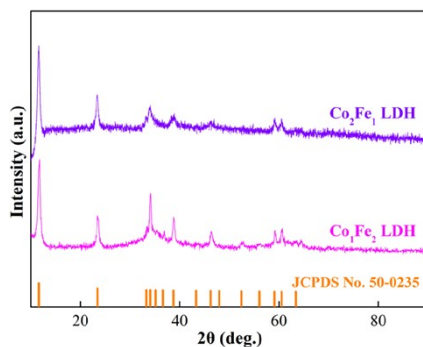

**Fig. S2** XRD patterns of the  $\text{Co}_2\text{Fe}_1$  LDH and  $\text{Co}_1\text{Fe}_2$  LDH

**Table S1.** Mass fraction of Co and Fe in different LDHs defined by ICP-OES.

| Sample                       | Co (wt. %) | Fe (wt. %) | Other elements (wt. %) |
|------------------------------|------------|------------|------------------------|
| $\text{Co}_2\text{Fe}_1$ LDH | 25.3       | 11.9       | 62.8                   |
| $\text{Co}_1\text{Fe}_1$ LDH | 19.2       | 18.5       | 62.3                   |
| $\text{Co}_1\text{Fe}_2$ LDH | 13.5       | 25.7       | 60.8                   |
| Co LDH                       | 35.3       | /          | 64.7                   |
| Fe LDH                       | /          | 41.2       | 58.8                   |

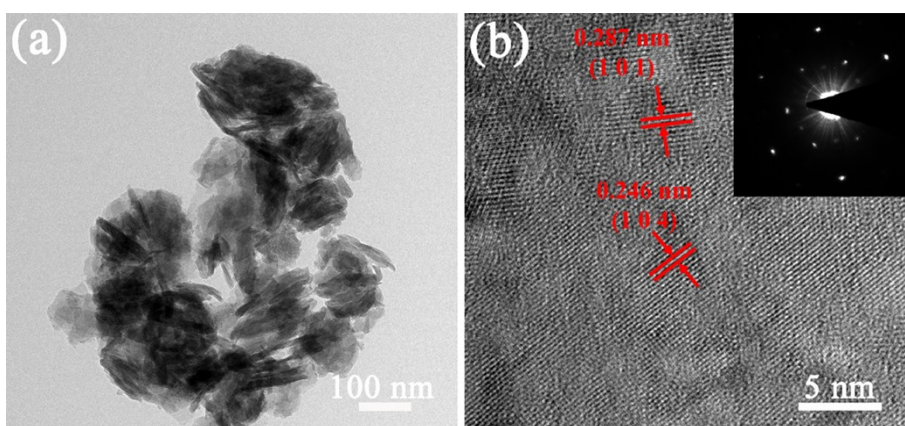

**Fig. S3** (a) TEM and (b) HRTEM images of  $\text{Co}_2\text{Fe}_1$  LDH, Inset to (b): Corresponding SAED pattern

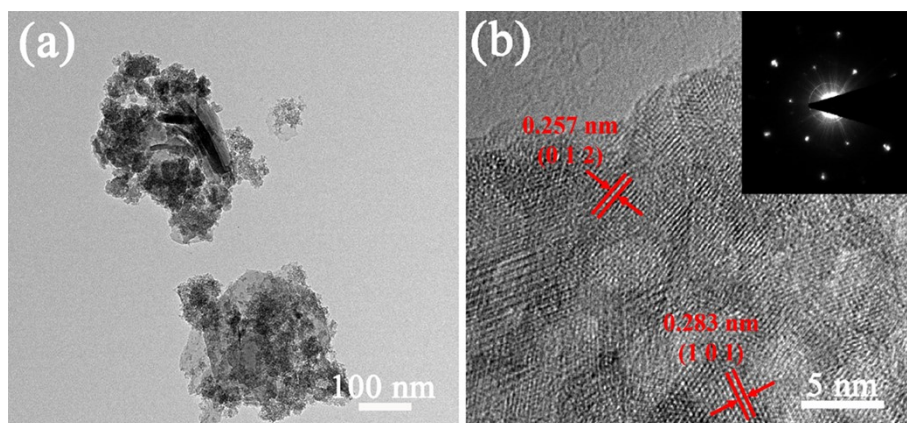

**Fig. S4** (a) TEM and (b) HR-TEM images of  $\text{Co}_1\text{Fe}_2$  LDH, Inset to (b): Corresponding SAED pattern

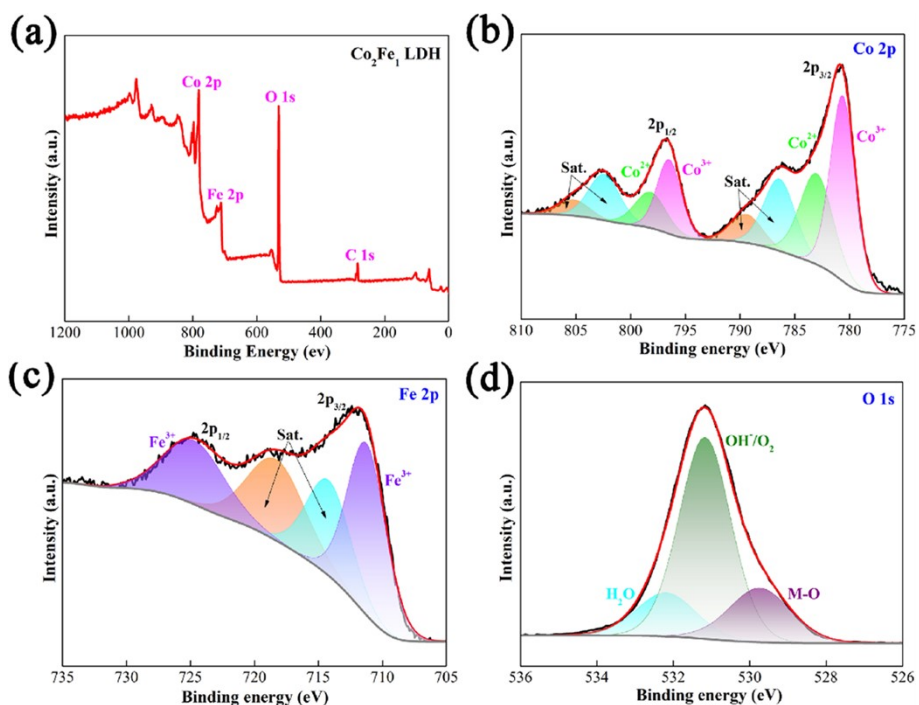

**Fig. S5** Electronic structure analysis of the  $\text{Co}_2\text{Fe}_1$  LDH: (a) XPS survey spectra, (b) Co 2p XPS spectra, (c) Fe 2p XPS spectra and (d) O 1s XPS spectra

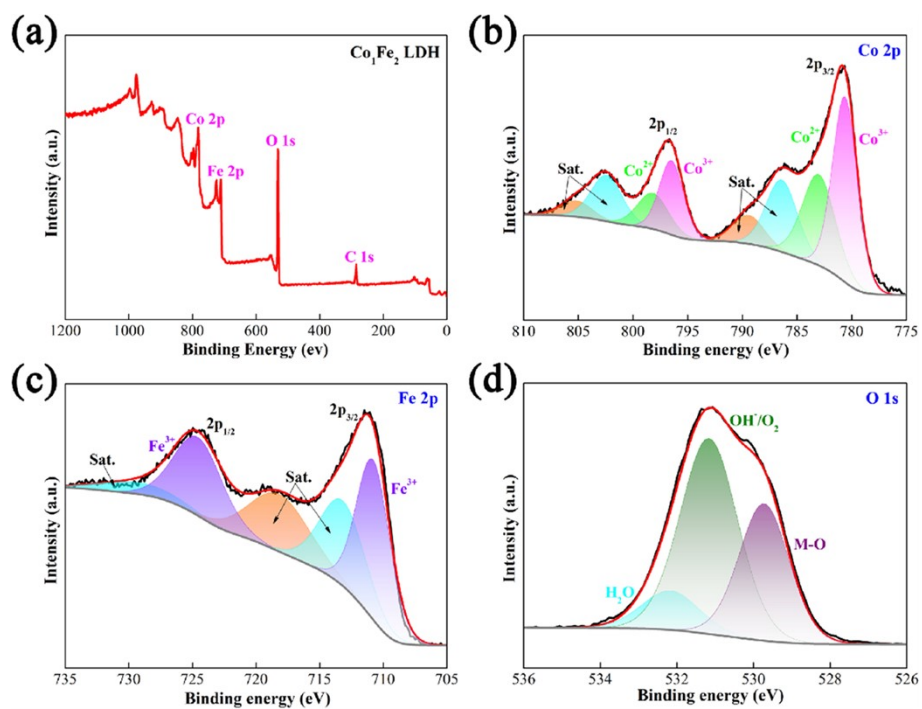

**Fig. S6** Electronic structure analysis of the  $\text{Co}_1\text{Fe}_2$  LDH: (a) XPS survey spectra, (b) Co 2p XPS spectra, (c) Fe 2p XPS spectra and (d) O 1s XPS spectra

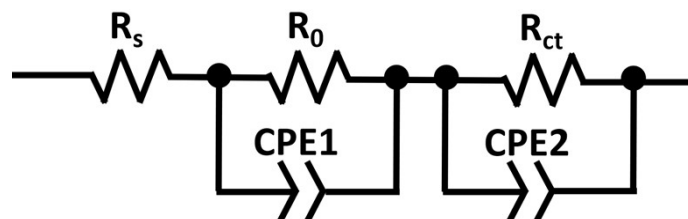

**Fig. S7** Equivalent electrical circuit of electrochemical impedance spectroscopy. An equivalent electrical circuit used to model the OER process.

**Table S2.** The values of  $R_{ct}$  of the  $\text{Co}_2\text{Fe}_1$  LDH,  $\text{Co}_1\text{Fe}_1$  LDH,  $\text{Co}_1\text{Fe}_2$  LDH, Co LDH and Fe LDH from EIS spectra.

| Samples               | $\text{Co}_2\text{Fe}_1$ LDH | $\text{Co}_1\text{Fe}_1$ LDH | $\text{Co}_1\text{Fe}_2$ LDH | Co LDH | Fe LDH | $\text{IrO}_2$ |
|-----------------------|------------------------------|------------------------------|------------------------------|--------|--------|----------------|
| $R_{ct}$ ( $\Omega$ ) | 1.53                         | 1.14                         | 1.46                         | 3.25   | 2.68   | 3.9            |

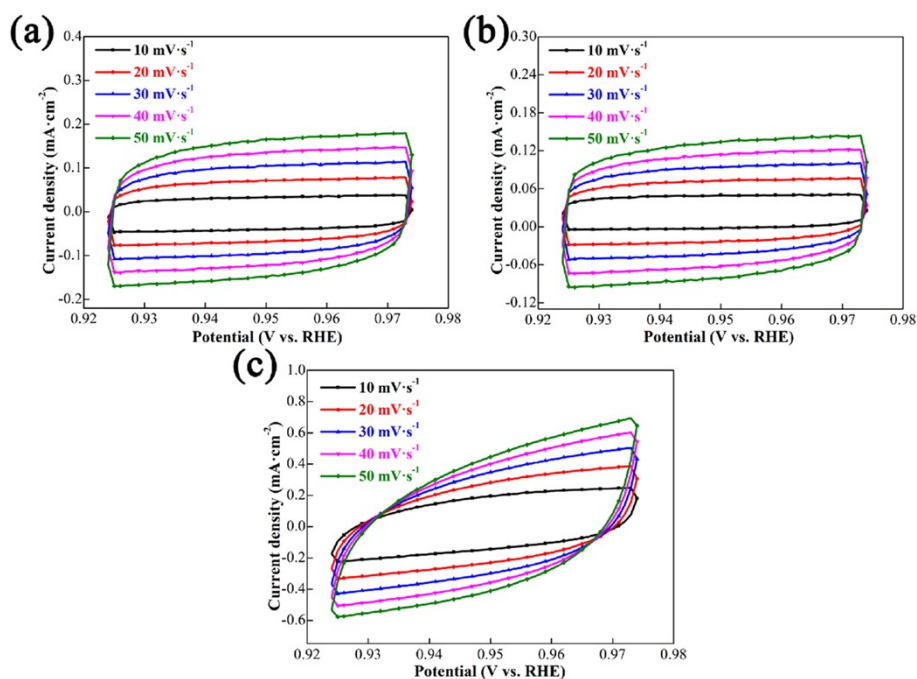

**Fig. S8** The scan rate-dependent CV curves of (a) Co LDH, (b) Fe LDH and (c)  $\text{Co}_1\text{Fe}_1$  LDH

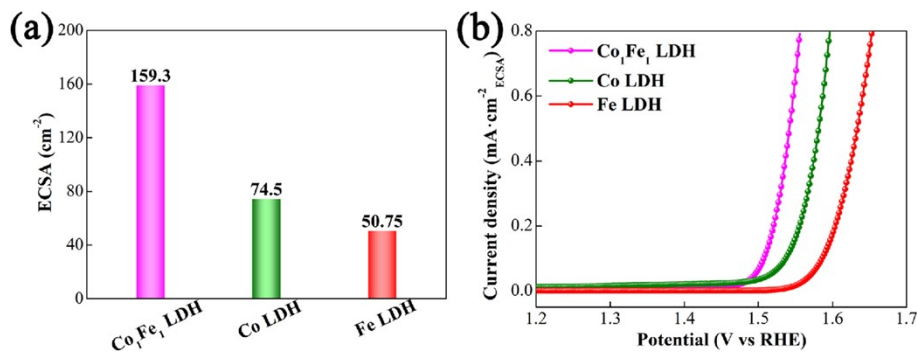

**Fig. S9** (a) ECSA and (b) ECSA-normalized OER activity of the  $\text{Co}_1\text{Fe}_1$  LDH, Co LDH and Fe LDH

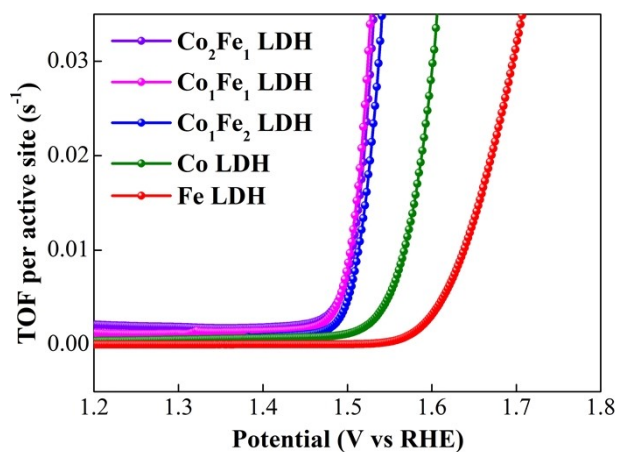

**Fig. S10** TOF curves of the  $\text{Co}_2\text{Fe}_1$  LDH,  $\text{Co}_1\text{Fe}_1$  LDH,  $\text{Co}_1\text{Fe}_2$  LDH, Co LDH and Fe LDH

**Table S3.** The values of TOFs of the  $\text{Co}_2\text{Fe}_1$  LDH,  $\text{Co}_1\text{Fe}_1$  LDH,  $\text{Co}_1\text{Fe}_2$  LDH, Co LDH and Fe LDH for OER.

| Samples                                                | $\text{Co}_2\text{Fe}_1$ LDH | $\text{Co}_1\text{Fe}_1$ LDH | $\text{Co}_1\text{Fe}_2$ LDH | Co LDH  | Fe LDH   |
|--------------------------------------------------------|------------------------------|------------------------------|------------------------------|---------|----------|
| TOFs for OER<br>@1.53 V vs. RHE<br>( $\text{S}^{-1}$ ) | 0.03295                      | 0.03839                      | 0.02246                      | 0.00253 | 0.000096 |

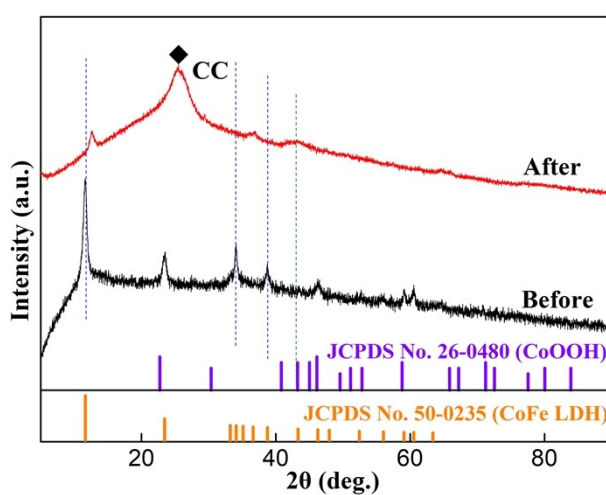

**Fig. S11** XRD patterns of  $\text{Co}_1\text{Fe}_1$  LDH before and after OER stability test

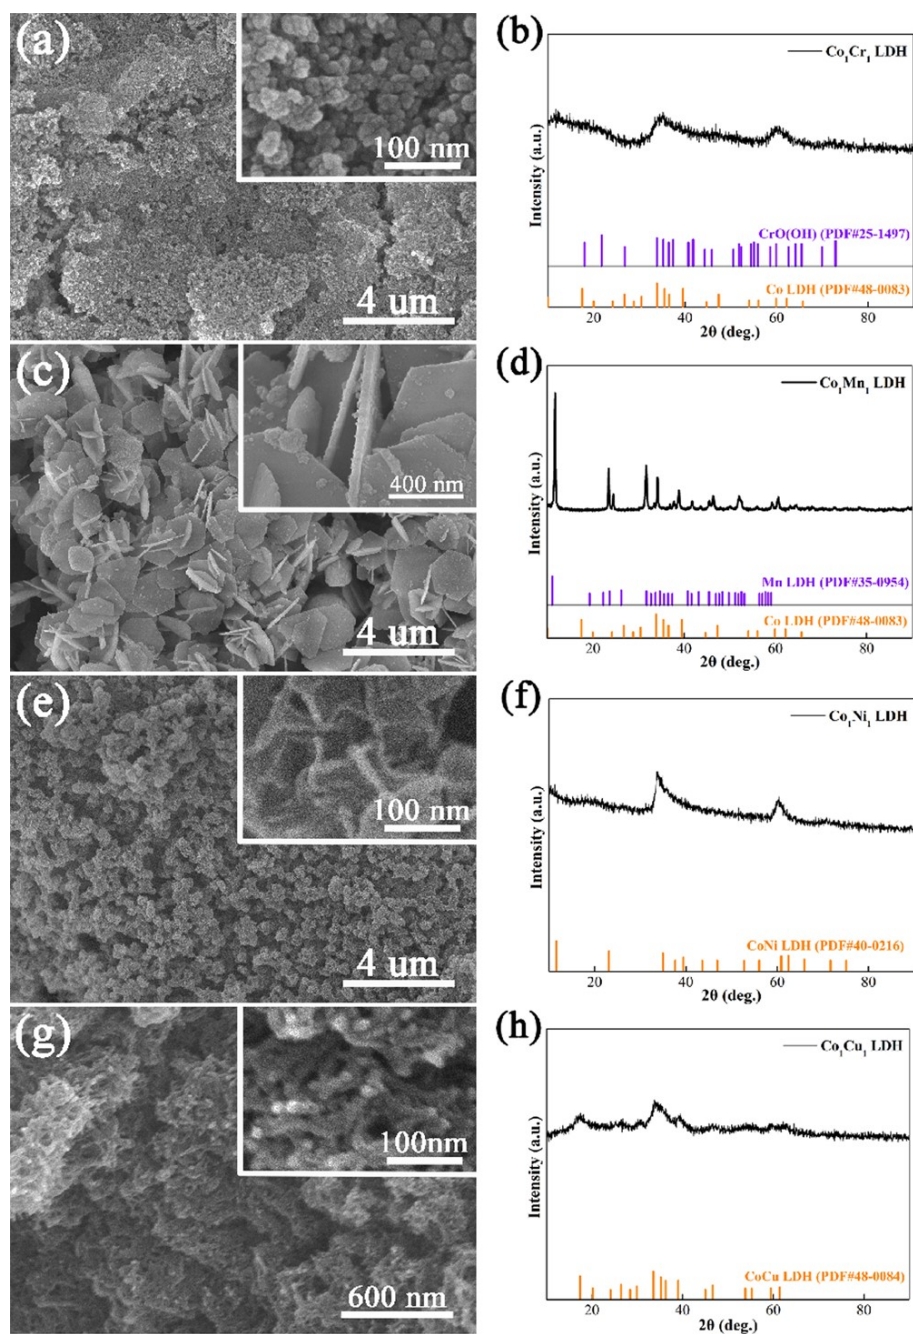

**Fig. S12** SEM images of different samples: (a)  $\text{Co}_1\text{Cr}_1\text{LDH}$ , (c)  $\text{Co}_1\text{Mn}_1\text{LDH}$ , (e)  $\text{Co}_1\text{Ni}_1\text{LDH}$  and (g)  $\text{Co}_1\text{Cu}_1\text{LDH}$ ; (b,d,f,h) the corresponding PXRD patterns of them

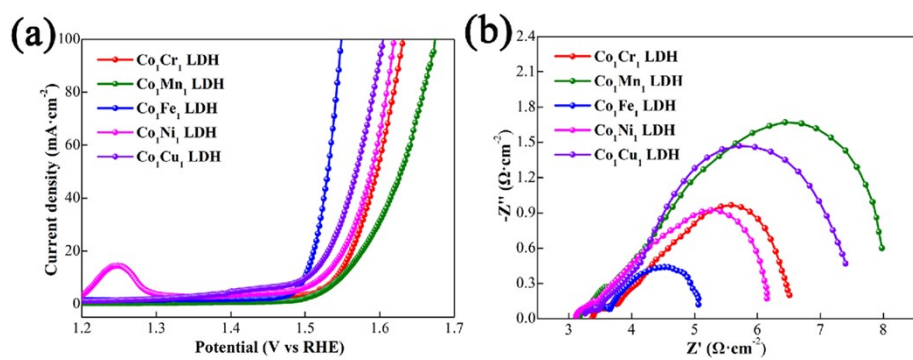

**Fig. S13** The LSV and EIS curves of different  $\text{Co}_1\text{M}_1\text{LDH}$ s

**Table S4.** Comparison of the OER activity between Co<sub>1</sub>Fe<sub>1</sub> LDH with other electrocatalysts in 1.0 M KOH

| Catalysts                                     | Catalyst loading<br>(mg cm <sup>-2</sup> ) | $\eta_{10}$<br>(mV) | Tafel slope<br>(mV dec <sup>-1</sup> ) | Reference                   |
|-----------------------------------------------|--------------------------------------------|---------------------|----------------------------------------|-----------------------------|
| <b>Co<sub>1</sub>Fe<sub>1</sub> LDH</b>       | <b>1.00</b>                                | <b>270</b>          | <b>42.7</b>                            | <b>This Work</b>            |
| Co-LDH FNSAs                                  | 0.18                                       | 300                 | 110                                    | Co-precipitation [S1]       |
| CoFe LDH                                      | 0.71                                       | 310                 | 72.7                                   | Hydrothermal [S2]           |
| Co <sub>1</sub> Fe <sub>0.2</sub> NPs         | 0.28                                       | 246                 | 37.0                                   | Co-precipitation [S3]       |
| Co <sub>0.55</sub> Fe <sub>0.45</sub> BPO-OER | 0.70                                       | 270                 | 26.0                                   | Hydrothermal [S4]           |
| CoFe-LDHs                                     | 1.00                                       | 310                 | 59.0                                   | Co-precipitation [S5]       |
| Co <sub>2</sub> FeO <sub>4</sub>              | 0.20                                       | 293                 | 67.0                                   | Hydrothermal [S6]           |
| CoFe-MOF-OH                                   | 0.21                                       | 351                 | 48.0                                   | Hydrothermal [S7]           |
| Co <sub>4</sub> Fe <sub>6</sub> -MOF          | 1.00                                       | 241                 | 30.1                                   | Co-precipitation [S8]       |
| CoFe LDH                                      | 0.10                                       | 404                 | -                                      | Solvothermal [S9]           |
| Co <sub>5</sub> Fe <sub>5</sub> O(OH)         | 0.20                                       | 276                 | 52.0                                   | Hydrothermal [S10]          |
| Fe-Co <sub>3</sub> O <sub>4</sub> @C/FTO      | 1.10                                       | 396                 | 68.6                                   | MOF-derived pyrolysis [S11] |
| FeSe <sub>2</sub>                             | 0.01                                       | 330                 | 48.1                                   | Solvothermal [S12]          |
| NF-PVP/CoFe <sub>1.3</sub>                    | 2.00                                       | 234                 | 46.4                                   | electro-spinning [S13]      |
| CoFe LDH                                      | --                                         | 280                 | 58.2                                   | Co-precipitation [S14]      |

## References

- [S1] T Wang, X Liu, Y Li, F Li, Z Deng and Y Chen, *Nano Res*, 2020, **13**, 79-80.
- [S2] M Li, Y Gu, Y Chang, X Gu, J Tian, X Wu and L Feng, *Chem. Eng. J.*, 2021, 130686.
- [S3] X Bai, Z Duan, B Nan, L Wang, T Tang and J Guan, *Chin. J. Catal.*, 2022, **43**, 2240–2248.
- [S4] L Reith, J Hausmann, S Mebs, I Mondal, H Dau, M Driess and P Menezes, *Adv. Energy Mater.*, 2023, 2203886-2203896.
- [S5] P Li, M Wang, X Duan<sup>1</sup>, L Zheng, X Cheng, Y Zhang, Y Kuang, Y Li, Q Ma, Z Feng, W Liu and X Sun, *Nat. Commun.*, 2019, **10**, 1711-1721.
- [S6] A Hanan, M Lakhan, D Shu, A Hussain, M Ahmed, I Soomro, V Kumar and D Cao, *Int. J. Hydrogen Energy.*, 2023, **2**, 49-63.
- [S7] Z Zou, T Wang, X Zhao, W Jiang, H Pan, D Gao and Cailing Xu, *ACS Catal.*, 2019, **9**, 7356–7364.
- [S8] X Hou, Z Han, X Xu, D Sarker, J Zhou, M Wu, Z Liu, M Huang and H Jiang, *Chem. Eng. J.*, 2021, **418**, 129330-129339.
- [S9] F Dionigi, Z Zeng, I Sinev, T Merzdorf, S Deshpande, M Lopez, S Kunze, I Zegkinoglou, H Sarodnik, Di Fan, A Bergmann, J, Drnec, J Araujo, M Gliech, D Teschner, J Zhu, We Li, J Greeley, B Cuenya and P Strasser, *Nat. Commun.*, 2020, **11**, 2522.
- [S10] J Chen, H Li, S Chen, J Fei, C Liu, Z Yu, K Shin, Z Liu, L Song, G Henkelman, L Wei and Y Chen, *Adv. Energy Mater.*, 2021, **11**, 2003412.
- [S11] D Raja, P Cheng, C Cheng, S Chang, C Huang and S Lu, *Appl. Catal. B-environ.*, 2022, **303**, 120899.
- [S12] R Gao, H Zhang and D Yan, *Nano Energy*, 2017, **31**, 90.
- [S13] Z Guo, W Ye, X Fang, J Wan, Y Ye, Y Dong, D Cao and D Yan, *Inorg. Chem. Front.*, 2019, **6**, 687.
- [S14] R Gao and D Yan, *Nano Res*, 2018, **11**, 1883.
